# Supplementary material
Source: HighWire-hosted journal article supplement (https://ep.bmj.com/content/103/5/241)
Supplement: inline-supplementary-material-1 [file inline-supplementary-material-1.pdf]

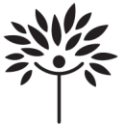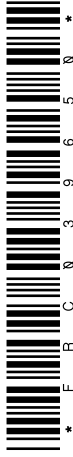

## Cystic Fibrosis annual review

UR NUMBER

SURNAME

GIVEN NAME(S)

DATE OF BIRTH

AFFIX PATIENT LABEL HERE ↑

Annual review appointment date:

Age:

Address:

CF physician:

GP:

Paediatrician:

### **Background history:**

Cystic fibrosis diagnosis:

Genotype:

Class:

Sweat chloride:

Age at diagnosis:

Mode of presentation:

### **Problem list:**

Active:

- |    |    |
|----|----|
| 1. | 5. |
| 2. | 6. |
| 3. | 7. |
| 4. | 8. |

Inactive:

Medical history (non-CF):

- |    |    |
|----|----|
| 1. | 3. |
| 2. | 4. |

### **Current medications:**

- |    |     |
|----|-----|
| 1. | 8.  |
| 2. | 9.  |
| 3. | 10. |
| 4. | 11. |
| 5. | 12. |
| 6. | 13. |
| 7. | 14. |

### **Allergies:**

UR NUMBER

SURNAME

GIVEN NAME(S)

DATE OF BIRTH

AFFIX PATIENT LABEL HERE ↑

**RESPIRATORY**

**At baseline:**

|                             |                                      |                                        |                                                                            |
|-----------------------------|--------------------------------------|----------------------------------------|----------------------------------------------------------------------------|
| <b>Cough:</b>               | <input type="checkbox"/> None        | <input type="checkbox"/> Dry           | <input type="checkbox"/> Moist                                             |
| If moist:                   | <input type="checkbox"/> With physio | <input type="checkbox"/> With exercise | <input type="checkbox"/> At other times                                    |
| <b>Sputum consistency:</b>  | <input type="checkbox"/> Thick       | <input type="checkbox"/> Thin          | <input type="checkbox"/> Sticky <input type="checkbox"/> Hard to cough up  |
| <b>Sputum amount:</b>       | <input type="checkbox"/> None        | <input type="checkbox"/> Teaspoon      | <input type="checkbox"/> Tablespoon <input type="checkbox"/> Bottom of cup |
|                             | <input type="checkbox"/> ¼ cup       | <input type="checkbox"/> >¼ cup        |                                                                            |
| <b>Shortness of breath:</b> | <input type="checkbox"/> Yes         | <input type="checkbox"/> No            |                                                                            |
| Comments:                   |                                      |                                        |                                                                            |

**Lung function:**

**Investigations:**

CT Chest:

CXR:

**ABPA:**                       Yes                       No

Screen:

**Admissions in past 12 months:**

| Date | Duration | Reason | Management | HITH |
|------|----------|--------|------------|------|
|      |          |        |            |      |
|      |          |        |            |      |
|      |          |        |            |      |
|      |          |        |            |      |
|      |          |        |            |      |
|      |          |        |            |      |
|      |          |        |            |      |
|      |          |        |            |      |

Comments:

UR NUMBER

SURNAME

GIVEN NAME(S)

DATE OF BIRTH

AFFIX PATIENT LABEL HERE ↑

**Physiotherapy review:**

Based on:  A/R appointment  Outpatient notes  Inpatient assessment

**Airway clearance:**

Regular routine:

Routine with exacerbation:

Technique reviewed:  Yes  No

Suggested changes:

**Airway clearance and inhalation therapy timeline:**

|         |           |         |
|---------|-----------|---------|
| Morning | Afternoon | Evening |
| 1.      | 1.        | 1.      |
| 2.      | 2.        | 2.      |
| 3.      | 3.        | 3.      |
| 4.      | 4.        | 4.      |

Suggested changes:

Home nebuliser type:

**Activity and Exercise:**

Exercise test: Type:

This year – Date:

| Level achieved | SpO <sub>2</sub> | HR    | Breathlessness | Leg fatigue |
|----------------|------------------|-------|----------------|-------------|
|                | Pre:             | Pre:  | Pre:           | Pre:        |
|                | Post:            | Post: | Post:          | Post:       |

Last year – Date:

| Level achieved | SpO <sub>2</sub> | HR    | Breathlessness | Leg fatigue |
|----------------|------------------|-------|----------------|-------------|
|                | Pre:             | Pre:  | Pre:           | Pre:        |
|                | Post:            | Post: | Post:          | Post:       |

**Infection:**

Number of specimens collected in past 12 months: gjksjkg

**Respiratory pathogens in past 12 months:**

- S. Aureus*  *S. maltophilia*  *Aspergillus*
- H.influenzae/H. parainfluenzae*  *Achromobacter*
- P. aeruginosa* Eradication past 12 months:  Inpatient  Outpatient
- NTM  Negative  Not done Species:
- Other

**Ever infected with *Pseudomonas*:**  Yes  No Dates (years):

**Chronically infected with:**

**Cohort:**

**Maintenance antibiotic regimen:**

UR NUMBER

SURNAME

GIVEN NAME(S)

DATE OF BIRTH

AFFIX PATIENT LABEL HERE ↑

## **GASTROINTESTINAL**

**DIOS (past 12 months):**

Yes

No

Management:

**CF-related liver disease:**

Yes

No

Abdominal ultrasound:

LFTs:

If CF-related liver disease:

Gastro-CF clinic:

Yes

No

Portal Hypertension:

Yes

No

Platelets:

INR:

Albumin:

## **NUTRITION**

**Enzymes:**

**Salt supplements :**

**Vitamin supplements:**

**Nutritional supplements:**

Yes

No

**Enteral feeds:**

Yes

No

Date gastrostomy inserted:

**Nutritional parameters:**

Fat-soluble vitamin status:

Iron status:

Zinc status:

**Nutritional support and food diary:**

UR NUMBER

SURNAME

GIVEN NAME(S)

DATE OF BIRTH

AFFIX PATIENT LABEL HERE ↑

**Growth:**

**ENDOCRINE**

**CF-related diabetes:**

Yes       No

OGTT:

If CF-related diabetes:

HbA1c:

Insulin:

Yes       No

Doses:

Endocrinology clinic:

Yes       No

Other comments:

**Vitamin D:**

Deficiency:

Yes       No

Level:

Date:

Stoss dose:

Yes       No

Date:

Maintenance:

Yes       No

**Bone density:**

DEXA scan:

**MUSCULOSKELETAL CONCERNS**

**CONTINENCE**

**OTHER MEDICAL CONCERNS**

UR NUMBER

SURNAME

GIVEN NAME(S)

DATE OF BIRTH

AFFIX PATIENT LABEL HERE ↑

**PSYCHOSOCIAL**

Family information:

Education and extracurricular activities:

Days of school missed in past year:

Social and community supports:

Other RCH supports:

Benefits:

Carer allowance with health care card

Disability support pension

Ex-carer allowance

Medical equipment payment

Victorian carer card

Others:

CF knowledge, adherence and impact of illness:

Screening assessments:

**Transition:**

Transition checklist:  10-13 yrs  14-16 yrs  16-18 yrs  N/A

Comments:

UR NUMBER

SURNAME

GIVEN NAME(S)

DATE OF BIRTH

AFFIX PATIENT LABEL HERE ↑

## **ADDITIONAL INFORMATION**

### **Outpatient appointments:**

| <b>Clinic</b>      | <b>Scheduled</b> | <b>Attended</b> |
|--------------------|------------------|-----------------|
| CF clinic          |                  |                 |
| Resp Med (inc A/R) |                  |                 |
| Drop in (resp)     |                  |                 |
| Gastroenterology   |                  |                 |
| Endocrinology      |                  |                 |
| Psychology         |                  |                 |
| Other              |                  |                 |

### **IV Access during admission:**

PORT-A-CATH    Midline    PICC    CVC

Sedation requirement:

GA    Midazolam    Nitrous Oxide    Awake    N/A

Comments:

**Research studies:**    AREST    COMBAT    Other (please list)

### **Preventative health:**

Routine immunisations:    Up to date    No

Influenza vaccine:    Yes    No

Household smoke exposure:    Yes    No   Comments:

### **Additional comments:**

UR NUMBER

SURNAME

GIVEN NAME(S)

DATE OF BIRTH

AFFIX PATIENT LABEL HERE ↑

**SUMMARY**

*Medical summary:*

Compiled by:

Date:

*Physiotherapy summary:*

Compiled by:

Date:

*Nutrition summary:*

Compiled by:

Date:

*Psychosocial summary:*

Compiled by:

Date:

**Follow up of previous annual review recommendations:**

**Recommendations for this year:**

Consultant:

Signature:

Date:
